# Supplementary material for: Achieving synergistic improvement in dielectric and energy storage properties at high-temperature of all-organic composites via physical electrostatic effect
Source: Royal Society of Chemistry journal article supplement (doi:10.1039/d3mh01822a), 2024-01-01
Supplement: d3mh01822a1.pdf [file d3mh01822a1.pdf]

**Achieving synergistic improvement in dielectric and energy storage properties at  
high-temperature of all-organic copolymers via physical electrostatic effect**

Yanan Shang<sup>a,b</sup>, Yu Feng<sup>a,b\*</sup>, Zhaotong Meng<sup>a,b</sup>, Changhai Zhang<sup>a,b</sup>, Tiandong

Zhang<sup>a,b</sup>, Qingguo Chi<sup>a,b\*</sup>

<sup>a</sup>Key Laboratory of Engineering Dielectrics and Its Application, Ministry of  
Education, Harbin University of Science and Technology, Harbin 150080, PR China

<sup>b</sup>School of Electrical and Electronic Engineering, Harbin University of Science and  
Technology, Harbin 150080, PR China

**Correspondence**

Email: [fengyu@hrbust.edu.cn](mailto:fengyu@hrbust.edu.cn) and [qgchi@hotmail.com](mailto:qgchi@hotmail.com)

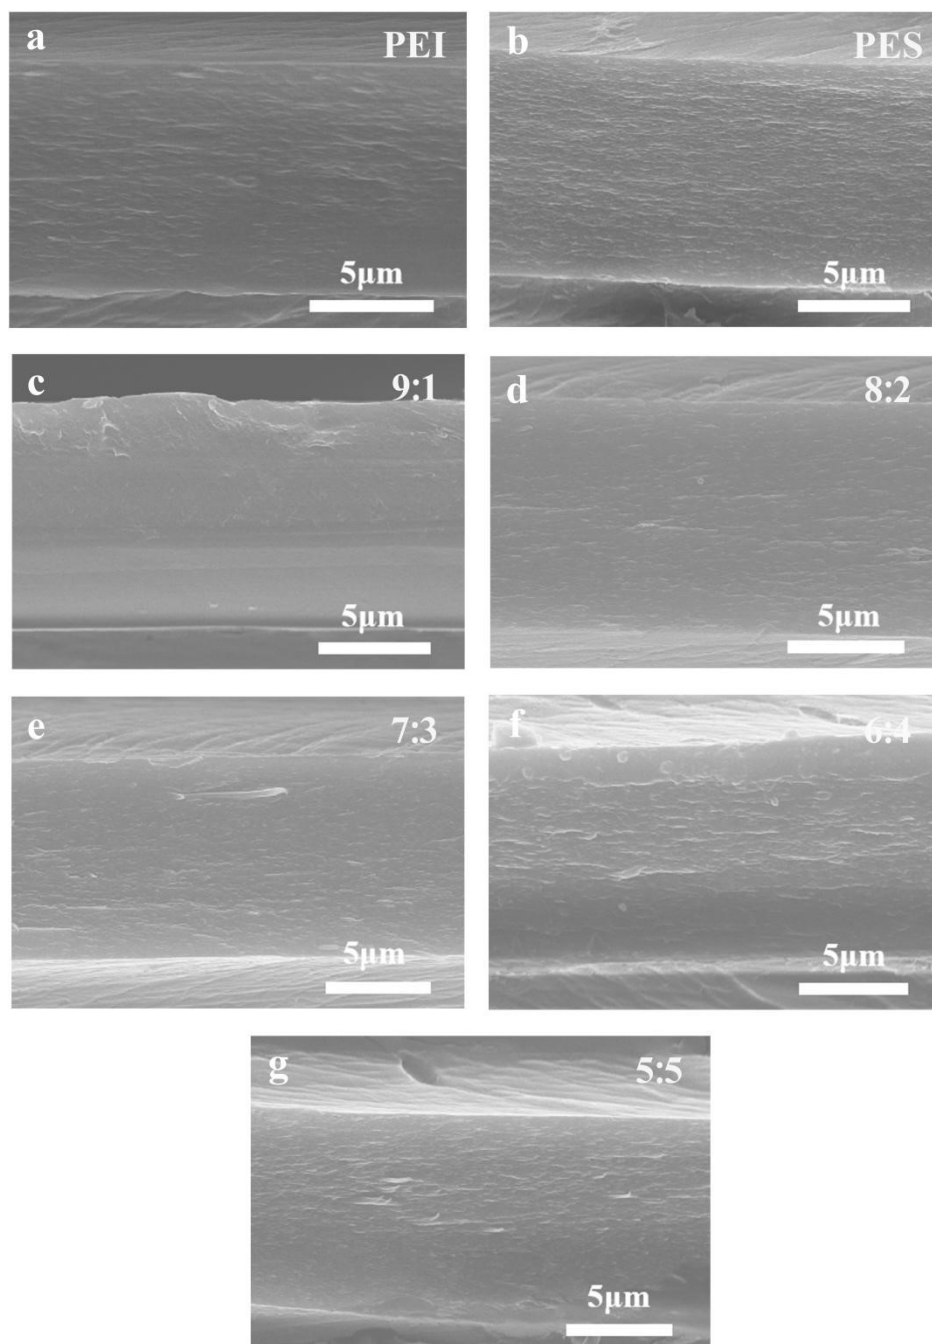

Fig.S1 SEM images of cross-section of the all-organic composite dielectrics.

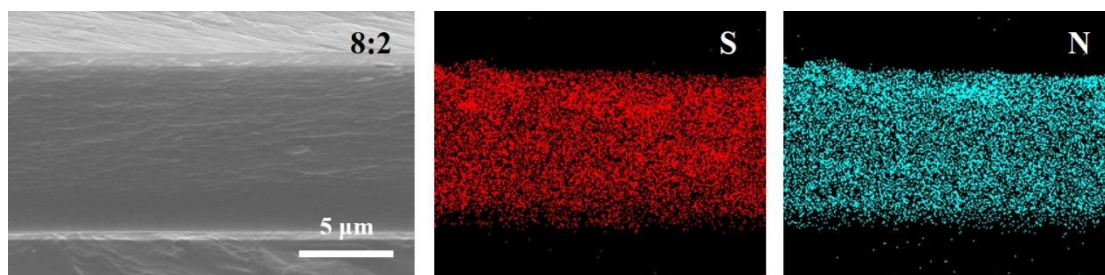

Fig.S2 SEM image and distribution of S and N elements in the cross-section.

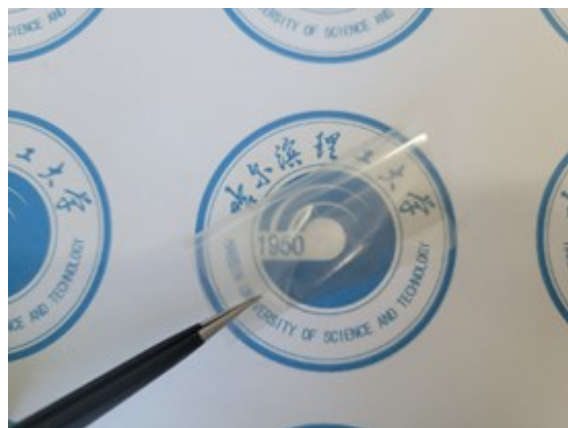

Fig.S3 optical photograph of the composite film.

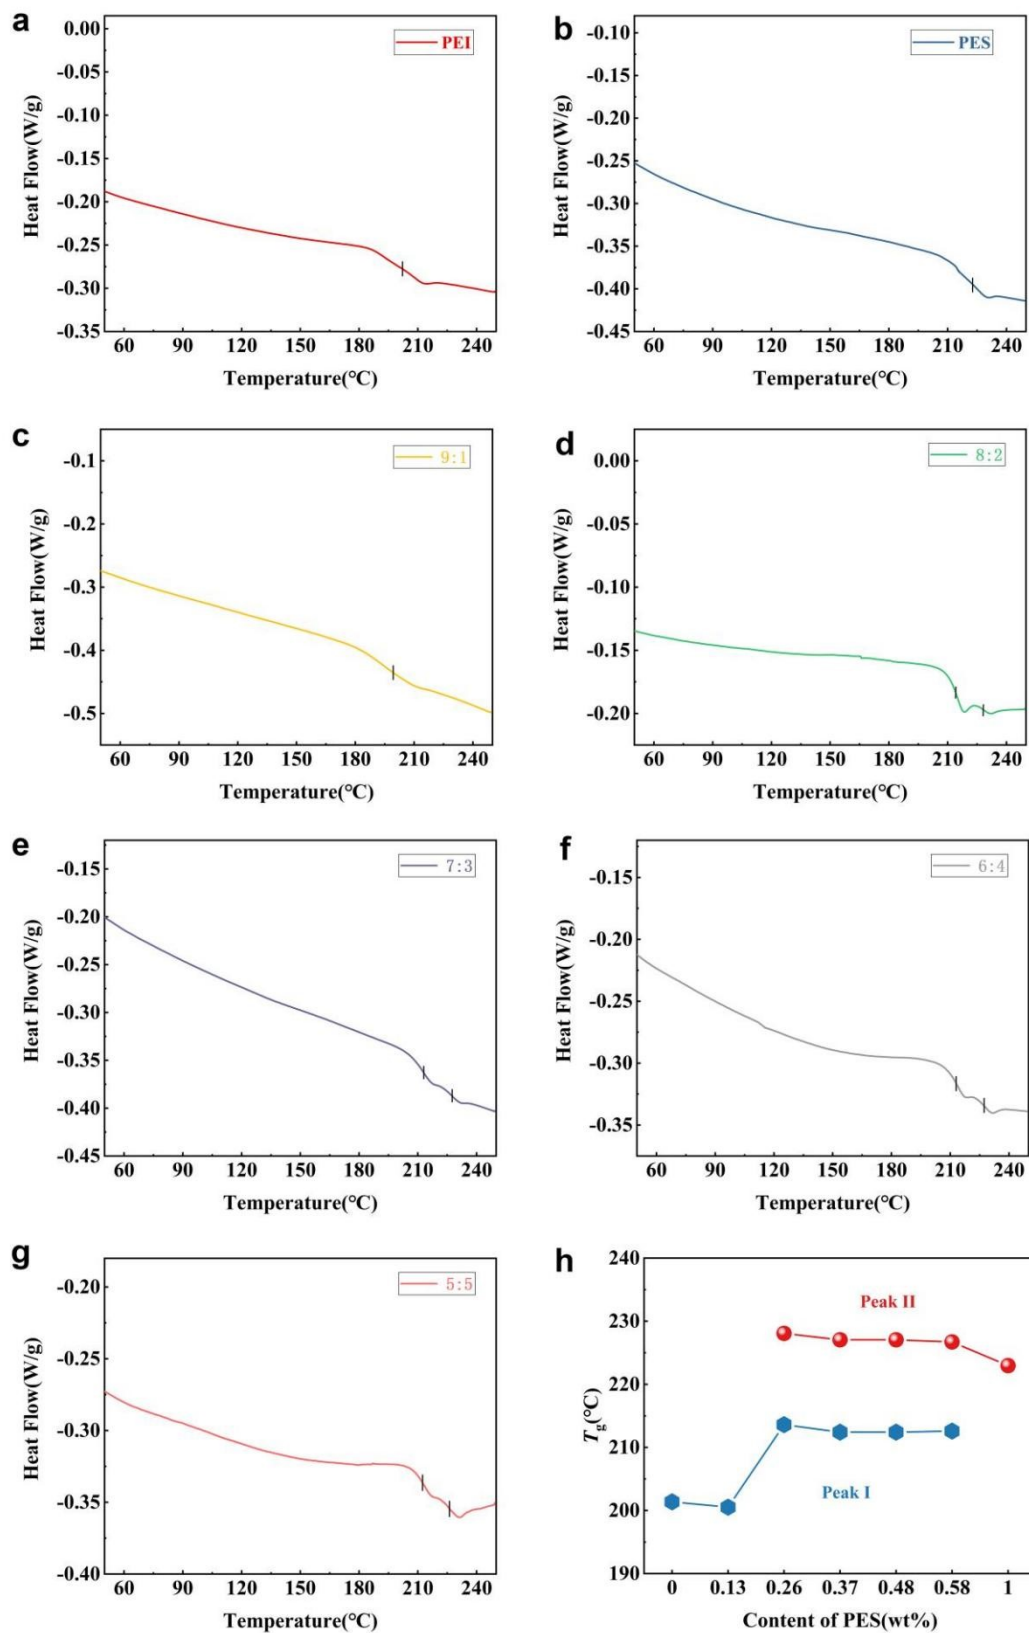

Fig.S4 DSC curves of (a) PEI; (b) PES; (c) 9:1; (d) 8:2; (e) 7:3; (f) 6:4; (g) 5:5; and (h)

$T_g$  of peak I and peak II.

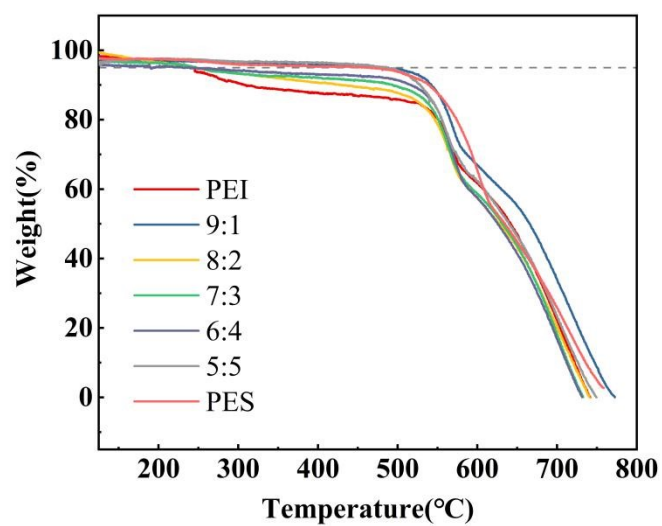

Fig.S5 TGA of the organic-organic composite dielectrics.

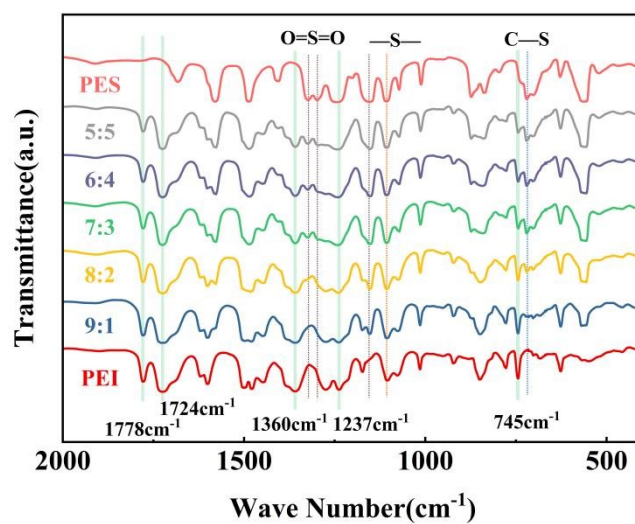

Fig.S6 FTIR spectra of the organic-organic composite dielectrics.

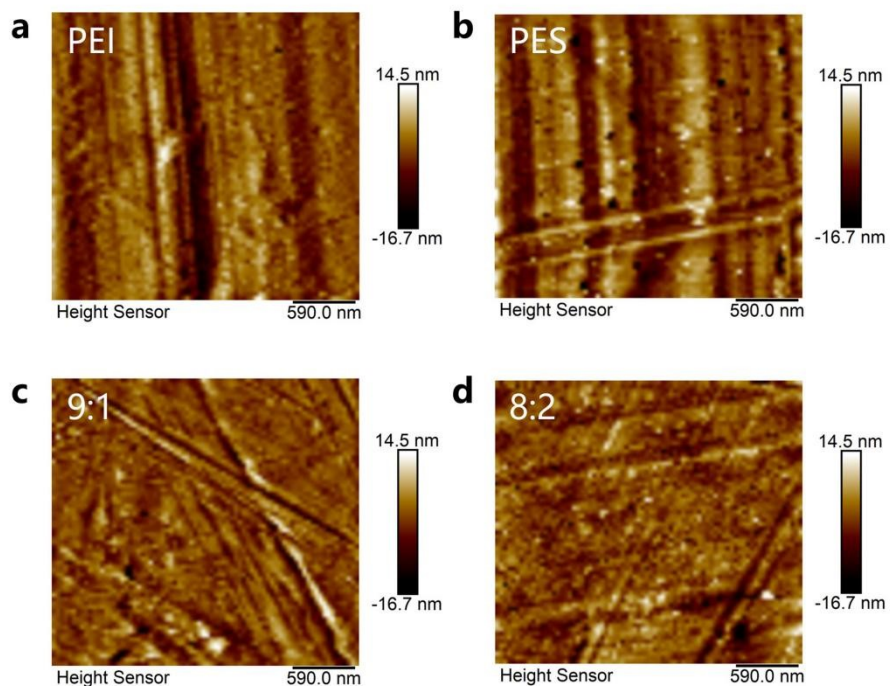

Fig.S7 AFM images of (a) PEI; (b) PES; (c) the 9:1 and (d) the 8:2 composite dielectrics.

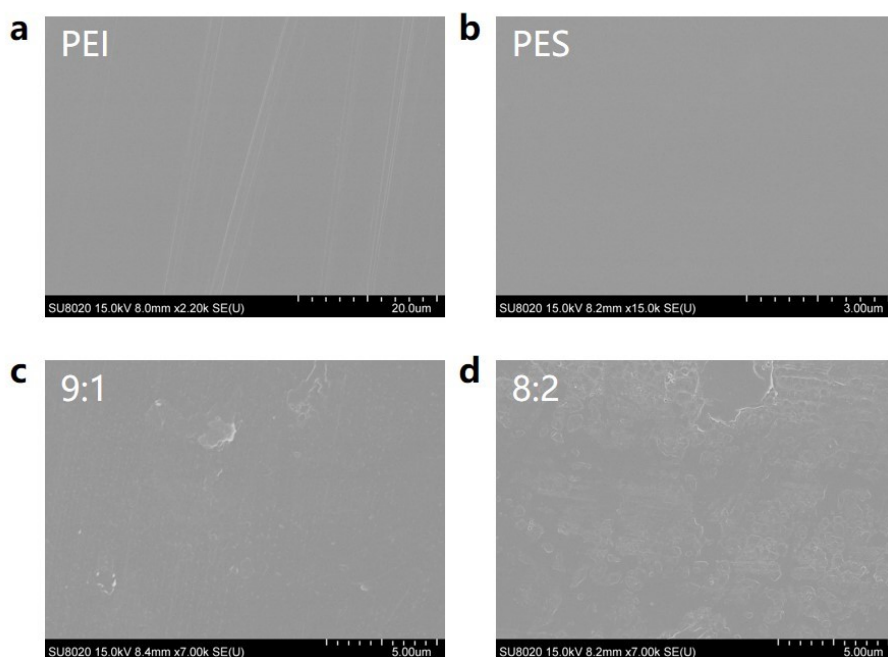

Fig.S8 Surface SEM images of (a) PEI; (b) PES; (c) the 9:1 and (d) the 8:2 composite dielectrics.

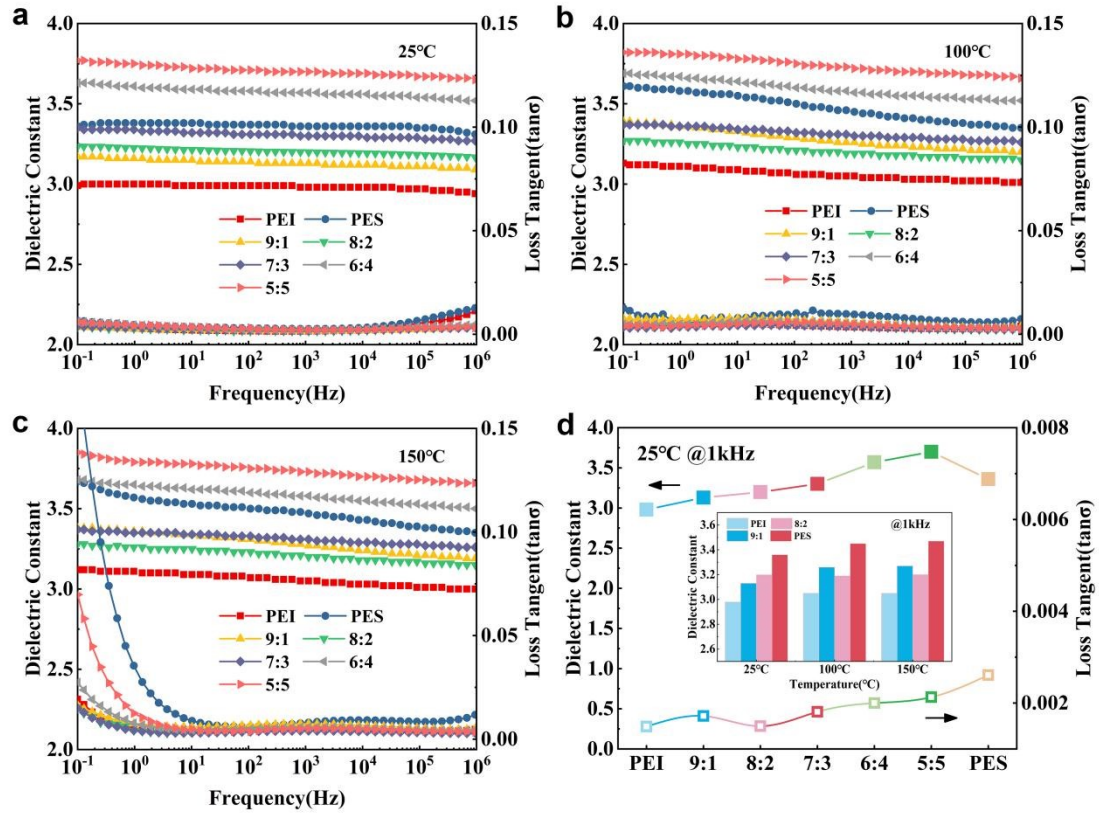

Fig.S9 Frequency dependence of the dielectric constant and loss tangent at (a) 25°C, (b) 100°C, and (c) 150°C; (d) dielectric constant and loss tangent at 1 kHz of the organic-organic composite dielectrics.

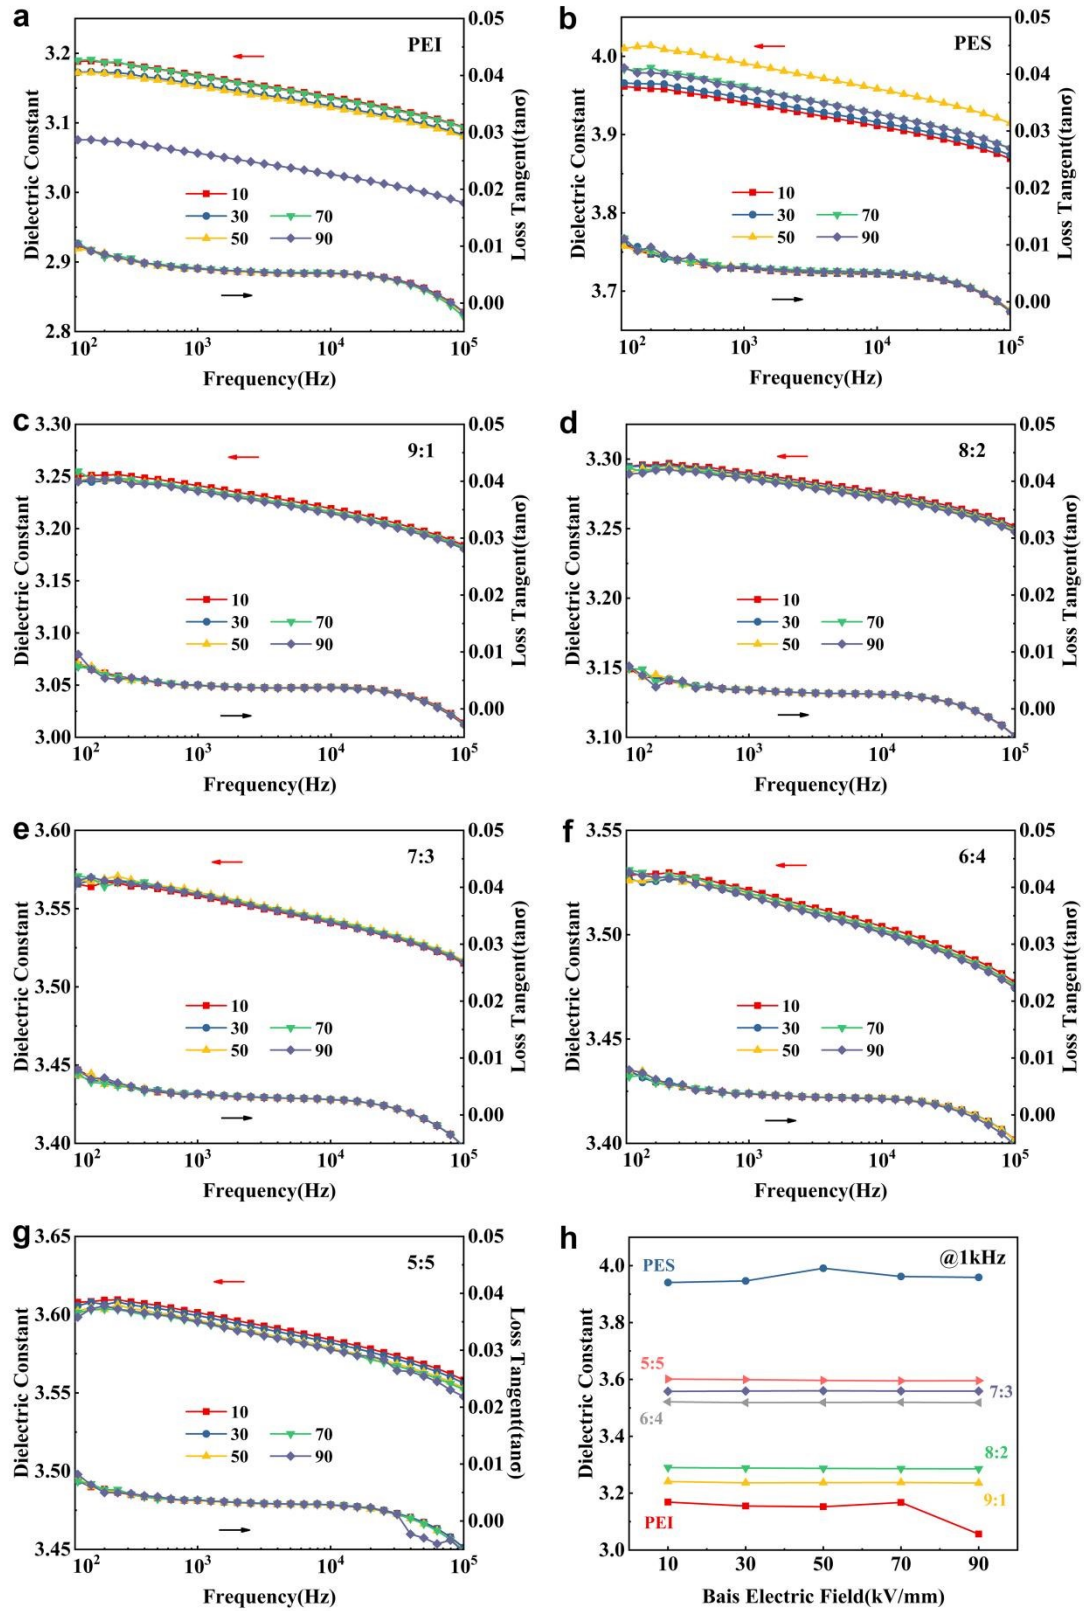

Fig.S10 Frequency dependence of dielectric constant and loss tangent at DC bias of (a) PEI; (b) PES; (c) the 9:1; (d) the 8:2; (e) the 7:3; (f) the 6:4; (g) the 5:5 and (h) variation of dielectric constant with electric field.

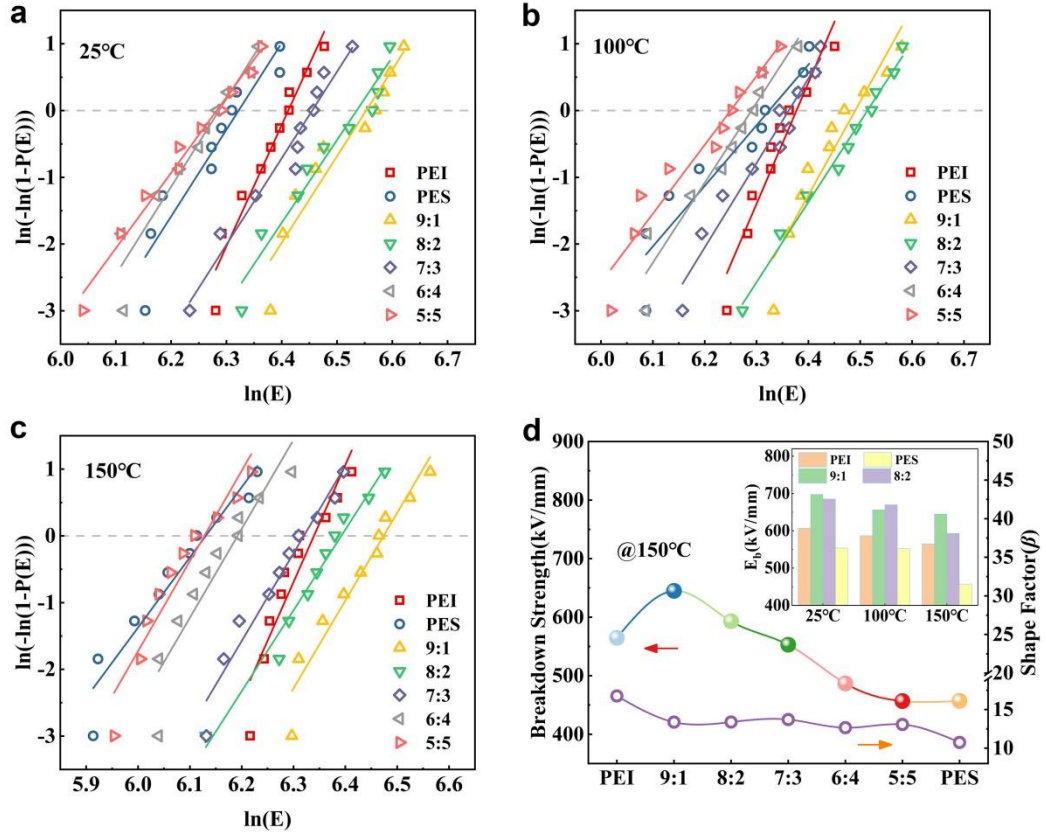

Fig.S11 Weibull breakdown distribution at (a) 25°C, (b) 100°C, and (c) 150°C; (d) breakdown strength and shape factor of the organic-organic composite dielectrics.

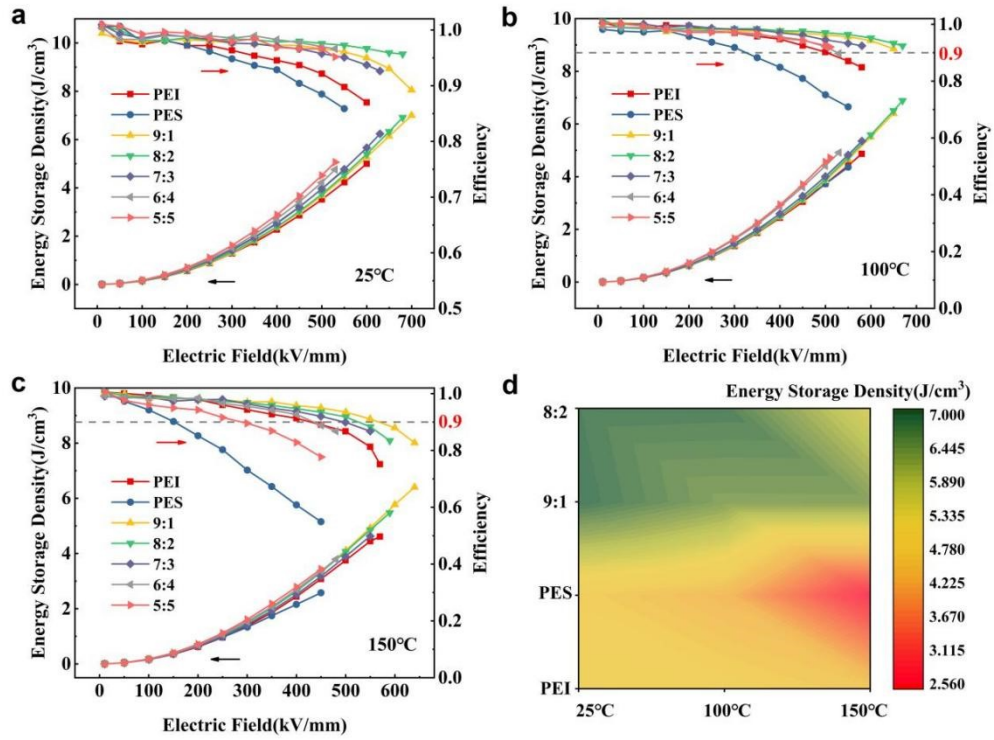

Fig.S12 Energy storage properties at (a) 25°C, (b) 100°C, and (c) 150°C; (d) contour map of energy storage density of the organic-organic composite dielectrics.

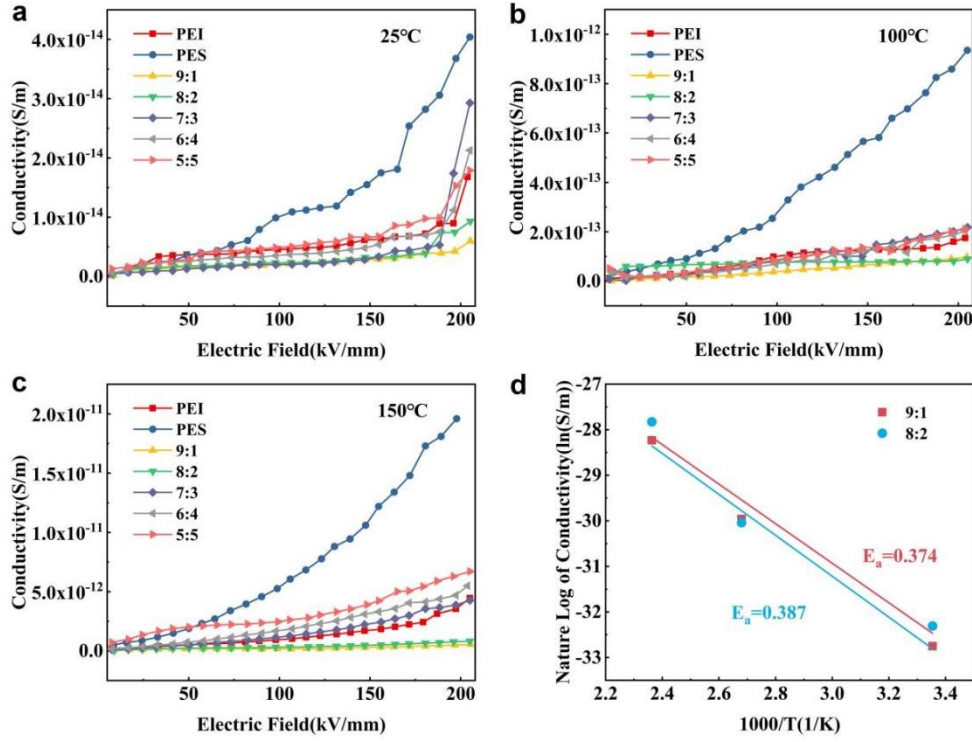

Fig.S13 Conductivity of the organic-organic composite dielectrics at (a) 25°C, (b) 100°C, and (c) 150°C; (d) activation energy of 9:1 and 8:2 composite dielectrics.

#### Conduction mechanism <sup>[1-4]</sup>

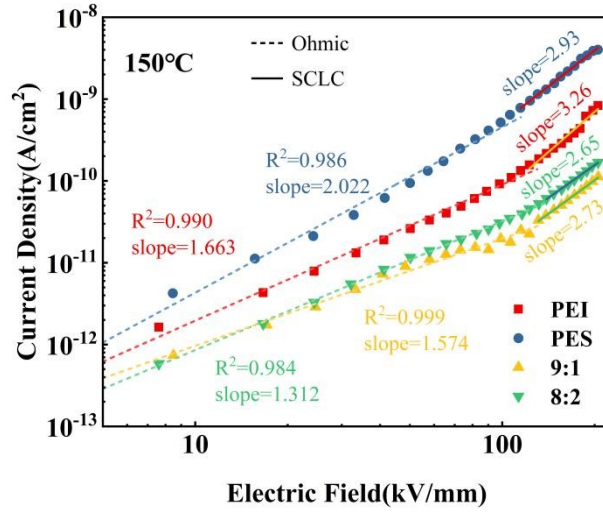

Fig.S14 Ohmic conduction and space charge limited current fitting.

#### Ohmic conduction

$$J = \sigma E \quad (S1)$$

where  $\sigma$  is the DC conductivity and  $E$  is the applied electric field. In the ohmic conduction model, the current density  $J$  is proportional to the electric field  $E$ . In Fig.S14, from 0 to 100 kV mm<sup>-1</sup>, the slope of all data fits is greater than 1, so the Ohmic conduction model is not applicable.

### Space charge limited current

$$J = \frac{9\mu\epsilon_r\epsilon_0 U^2}{8d^3} \quad (\text{S2})$$

where  $\mu$  is the carrier mobility,  $\epsilon_r$  is the dielectric constant,  $\epsilon_0$  is the vacuum dielectric constant,  $U$  is the applied voltage and  $d$  is the thickness of the sample. In Eq. S2, the current density  $J$  is positively related to the square of  $E$ . In contrast, in Fig.S14, from 100 to 200 kV mm<sup>-1</sup>, the slopes of the fitted straight lines are all greater than 2. Therefore, the space charge-limited current model is not applicable.

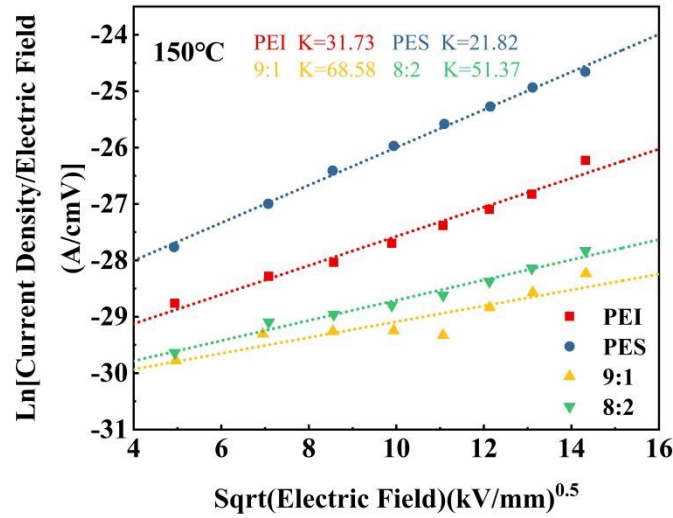

Fig.S15 Poole-Frenke emission fitting.

### Poole-Frenke emission

$$J = \sigma_0 E \exp\left(\frac{-\mu_{PF} + e\sqrt{eE/\pi\epsilon_r\epsilon_0}}{K_B T}\right) \quad (\text{S3})$$

where  $\sigma_0$  is the conductivity,  $E$  is the applied electric field,  $\mu_{PF}$  is the trap barrier

height,  $e$  is the elementary charge,  $\epsilon_r$  is the dielectric constant,  $\epsilon_0$  is the vacuum dielectric constant,  $K_B$  is the Boltzmann constant and  $T$  is the temperature.

Eq. S3 takes logarithms on both sides and can be deformed as:

$$\ln\left(\frac{J}{E}\right) = \ln(\sigma_0) - \left(\frac{\mu_{PF}}{K_B T}\right) + \left(\frac{e\sqrt{e/\pi\epsilon_r\epsilon_0}}{K_B T}\right)\sqrt{E} \quad (S4)$$

It can be seen that  $\ln(J/E)$  is positively related to  $E^{0.5}$ . The P-F emission fitting results are shown in Fig.S15, and although the data points are well fitted, the value of  $k$  calculated from the slopes differs by an order of magnitude from the experimental data, so the P-F emission model is not applicable either.

### Schottky emission

$$J = A_R T^2 \exp\left(\frac{-\phi_B + e\sqrt{eE/4\pi\epsilon_r\epsilon_0}}{K_B T}\right) \quad (S5)$$

where  $A_R$  is the effective Richardson constant,  $\phi_B$  is the interface energy barrier height,  $e$  is the elementary charge,  $E$  is the applied electric field,  $\epsilon_r$  is the dielectric constant,  $\epsilon_0$  is the vacuum dielectric constant and  $K_B$  is the Boltzmann constant and  $T$  is the temperature. Eq. S5 can be deformed as:

$$\ln\left(\frac{J}{T^2}\right) = \ln(A_R) - \left(\frac{\phi_B}{K_B T}\right) + \left(\frac{e\sqrt{e/4\pi\epsilon_r\epsilon_0}}{K_B T}\right)\sqrt{E} \quad (S6)$$

$\ln(J/T^2)$  is positively related to  $E^{0.5}$ . The results of the Schottky emission fitting are shown in Fig.S16, where the data points are well fitted and the value of  $\epsilon_r$  calculated from the slope is consistent with the experimental data, thus the low field is consistent with the Schottky emission model.

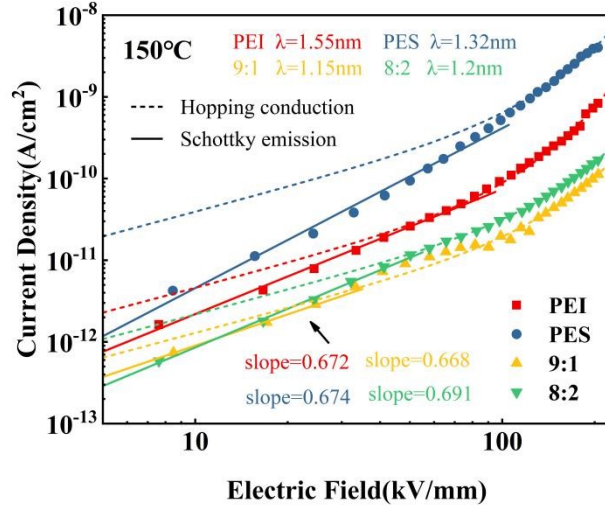

Fig.S16 Schottky emission and hopping conduction fitting.

### Hopping conduction model

$$J(E, T) = 2ne\lambda v \cdot \exp\left(-\frac{W_a}{K_B T}\right) \cdot \sinh\left(\frac{\lambda e E}{2K_B T}\right) \quad (S7)$$

where  $n$  is the carrier concentration,  $e$  is the charge of the carriers,  $\lambda$  is the hopping distance,  $v$  is the attempt-to-escape frequency,  $W_a$  is the activation energy, and  $K_B$  is the Boltzmann constant and  $T$  is the temperature. That can be simplified as:

$$J = A * \sinh(B * x) \quad (S8)$$

where  $A$  and  $B$  are two lumped parameters. The frequency hopping conduction model was well fitted with  $\lambda$  of 1.55nm, 1.32nm, 1.15nm and 1.2nm for PEI, PES, 9:1 and 8:2 composites, respectively.

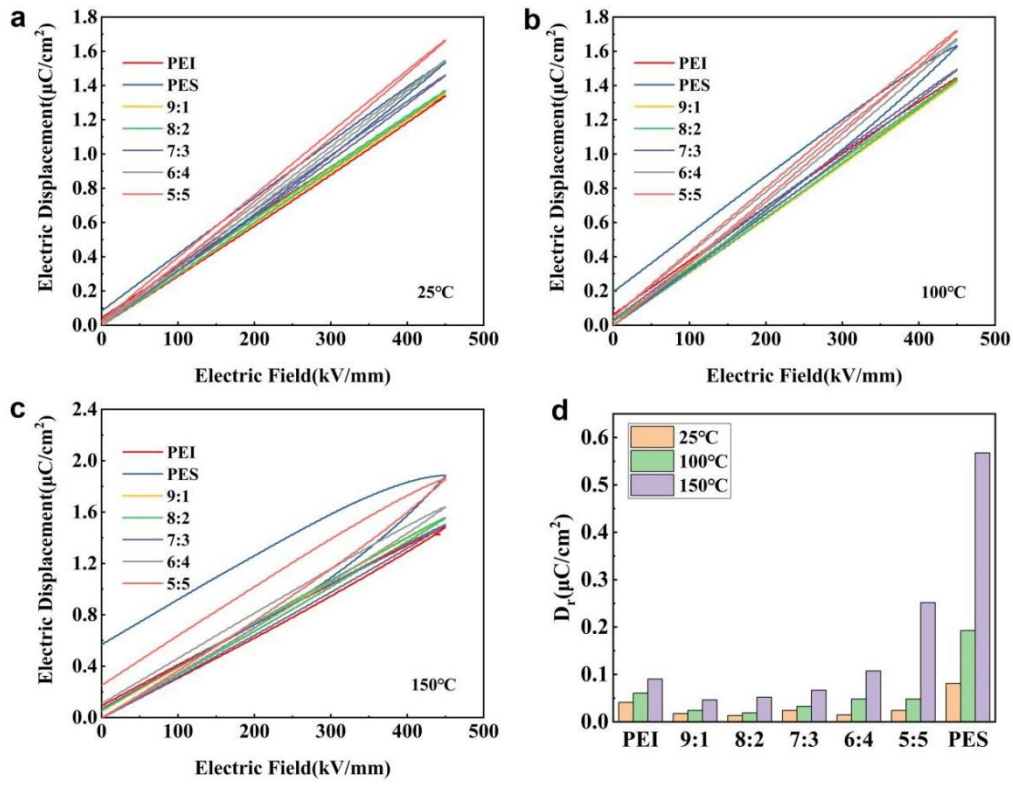

Fig.S17  $D$ - $E$  loops at (a) 25°C, (b) 100°C, and (c) 150°C; (d)  $D_r$  of the organic-organic composite dielectrics at 25°C, 100°C and 150 °C.

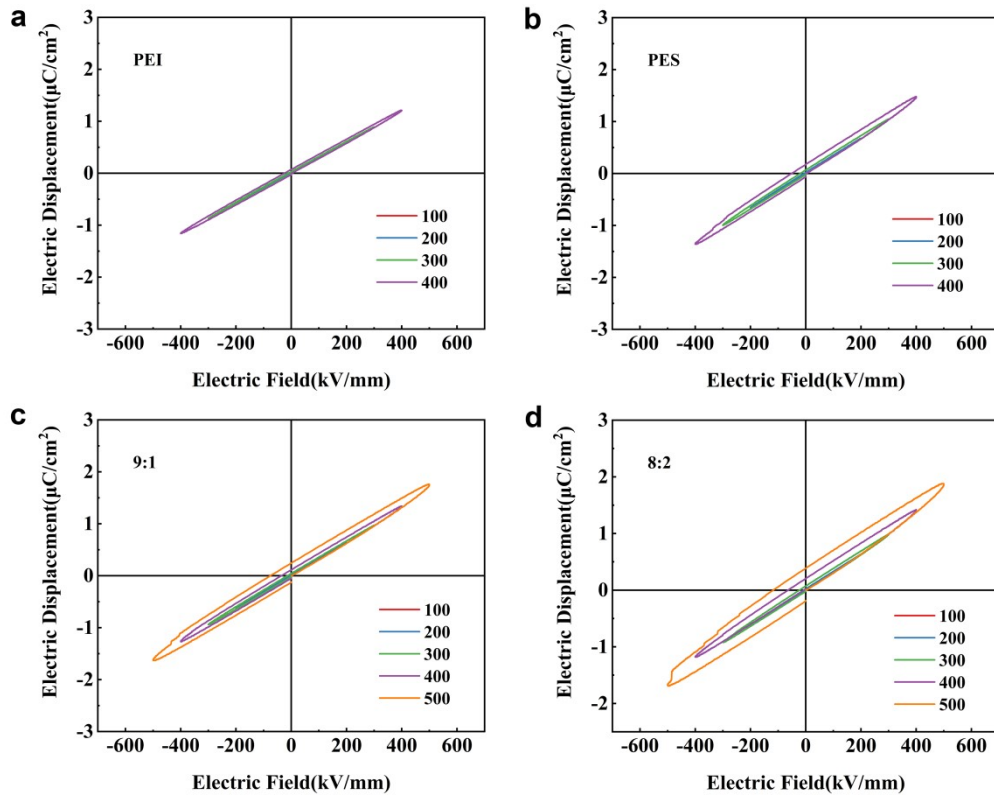

Fig.S18  $D$ - $E$  loops of (a) PEI; (b) PES; (c) the 9:1 and (d) the 8:2 composite dielectrics under sine signal at 25°C.

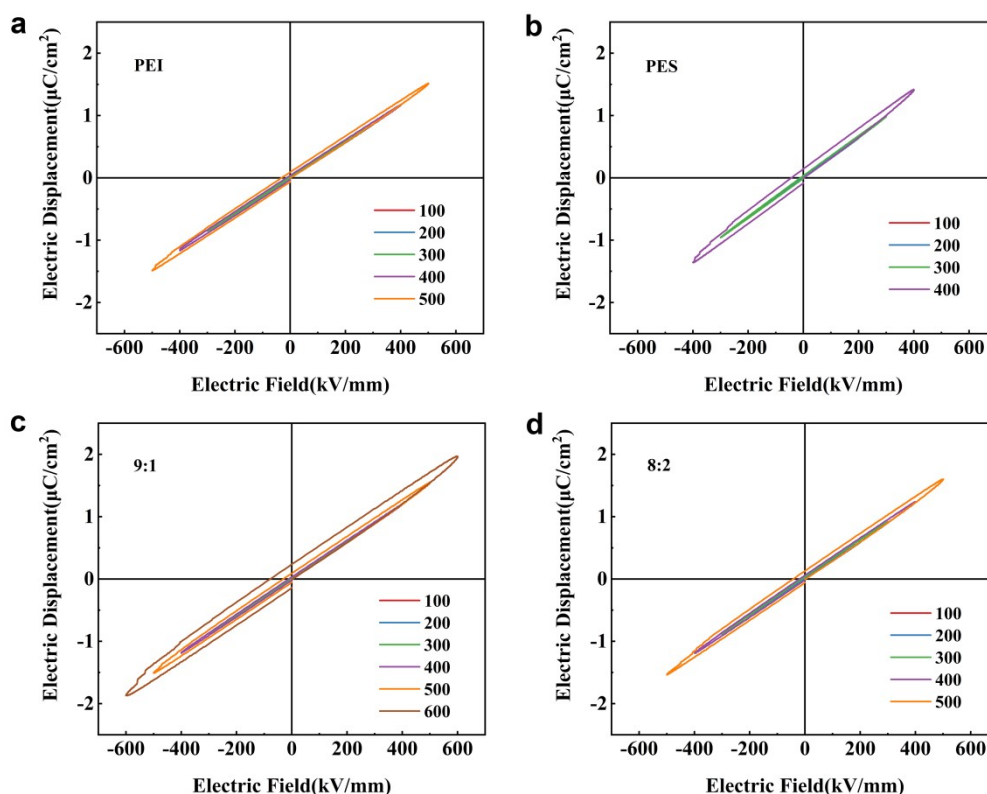

Fig.S19 *D-E* loops of (a) PEI; (b) PES; (c) the 9:1 and (d) the 8:2 composite dielectrics under sine signal at 100°C.

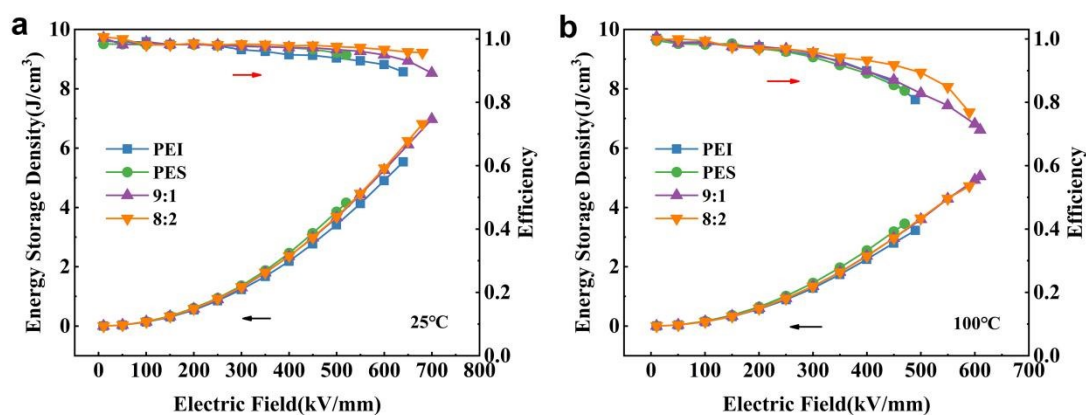

Fig.S20 Energy storage properties under triangle wave at (a) 25°C and (b) 100°C.

## References

- [1] H. Li, B. S. Chang, H. Kim, Z. L. Xie, A. Lainé, L. Ma, T. L. Xu, C. Q. Yang, J. Kwon, S. W. Shelton, L. M. Klivansky, V. Altoé, B. Gao, A. M. Schwartzberg, Z. R. Peng, R. O. Ritchie, T. Xu, M. Salmeron, R. Ruiz, K. Barry Sharpless, P. Wu,

- Y. Liu, *Joule*, 2023, **7**(1), 95-111.
- [2] M. C. Yang, S. J. Wang, J. Fu, Y. J. Zhu, J. J. Liang, S. Cheng, S. X. Hu, J. Hu, J. L. He, Q. Li, *Adv. Mater.*, 2301936.
- [3] J. F. Dong, L. Li, P. Q. Qiu, Y. P. Pan, Y. J. Niu, L. Sun, Z. Z. Pan, Y. Q. Liu, L. Tan, X. W. Xu, C. Xu, G. F. Luo, Q. Wang, H. Wang, *Adv. Mater.*, 2023, **35**(20), 2211487.
- [4] J. H. Song, H. M. Qin, S. Y. Qin, M. Liu, S. X. Zhang, J. Y. Chen, Y. Zhang, S. Wang, Q. Li, L. J. Dong, C. X. Xiong, *Mater. Horiz.*, 2023, **10**, 2139-2148.
